# Supplementary material for: Coherent Functional Modules Improve Transcription Factor Target Identification, Cooperativity Prediction, and Disease Association
Source: PubMed Central journal article supplement (PMC3916285; doi:10.1371/journal.pgen.1004122), 2014-02-06

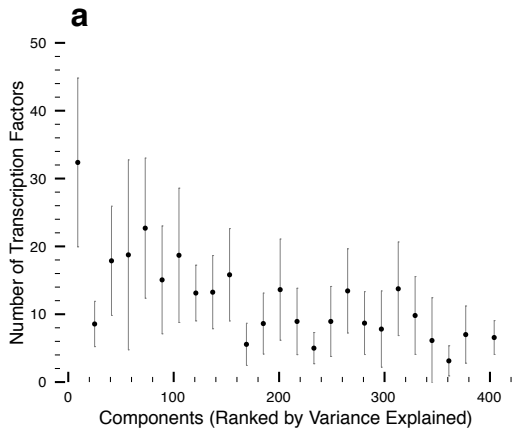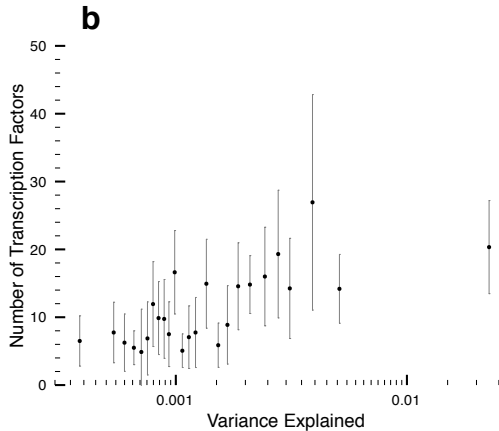

Supplement: pgen.1004122.s004.pdf [file pgen.1004122.s004.pdf]
